# Supplementary material
Source: PubMed Central journal article supplement (PMC4837004)
Supplement: NIHMS725847-supplement-Supp_FigureS1.pdf [file NIHMS725847-supplement-Supp_FigureS1.pdf]

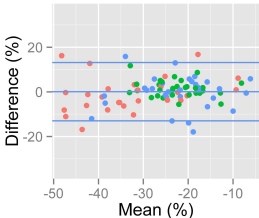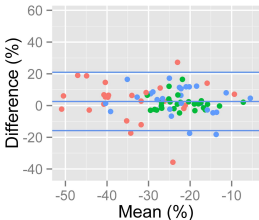

**Segment**

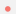

Subtricuspid

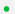

Anterior Wall

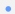

Apical

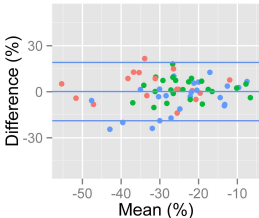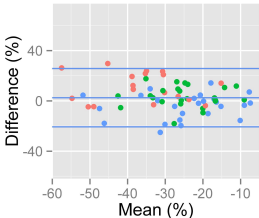

**Segment**

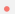

Subtricuspid



Anterior Wall



Apical

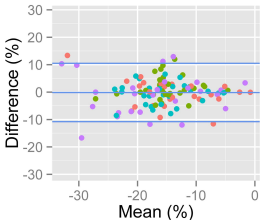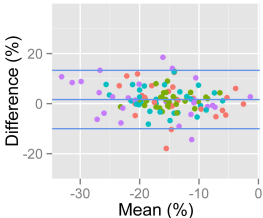

**Segment**    ● Outflow Tract    ● Free Wall    ● Angle    ● Inferior
